# Supplementary material
Source: ML conference proceedings conference paper supplement (https://openreview.net/forum?id=luyXPdkNSN)
Supplement: supplementary_material [file attachment]

314 **Supplementary Materials for "K-Nearest-Neighbor Local Sampling Based**  
315 **Conditional Independence Testing"**

316 **A Theoretical results**

317 **A.1 Proof of Lemma 1**

*Proof.* Recall that  $Z$  is a random vector taking values in Euclidean space  $(\mathbb{R}^{d_z}, \|\cdot\|_2)$ , where  $d_z$  is the dimension of  $Z$  and  $\|\cdot\|_2$  is Euclidean distance.  $Z_1, Z_2, \dots, Z_n$  are i.i.d. random vectors according to  $p(z)$ . For a fixed  $z \in \mathbb{R}^{d_z}$ , we denote by  $Z_n^{(1)}(z), \dots, Z_n^{(n)}(z)$  a reordering of  $Z_1, Z_2, \dots, Z_n$  according to the increasing values of  $\|Z_i - z\|_2$ , that is,

$$\|Z_n^{(1)}(z) - z\|_2 \leq \dots \leq \|Z_n^{(n)}(z) - z\|_2.$$

318 Define the set  $G = \{z \in \mathbb{R}^{d_z} \mid \forall \delta > 0, P(\{\omega : Z(\omega) \in S_z(\delta)\}) > 0\}$ , where  $S_z(\delta) = \{x \in$   
319  $\mathbb{R}^{d_z} \mid \|x - z\|_2 \leq \delta\}$ . For convenience, we omit  $\omega$  in probability in the following paper. For example,  
320 write  $P(Z \in S_z(\delta))$  instead of  $P(\{\omega : Z(\omega) \in S_z(\delta)\})$ . By definition, for  $z \in G, \forall \delta > 0,$   
321  $P(Z \in S_z(\delta)) > 0$ . Let  $G^c$  be the complement of  $G$ . Then, for  $z \in G^c, \exists r_z > 0$ , s.t.  $\forall r < r_z,$   
322  $P(Z \in S_z(r)) = 0$ . Note that  $P(\|Z_n^{(k)}(z) - z\|_2 > \delta) = P(Z_n^{(k)}(z) \notin S_z(\delta))$ .

323 In order to prove  $\|Z_n^{(k)}(Z) - Z\|_2 \rightarrow 0$  a.s., it is sufficient to prove  $\forall \delta > 0,$   
324  $\lim_{n \rightarrow \infty} P(\sup_{m \geq n} \|Z_m^{(k)}(Z) - Z\|_2 > \delta) = 0$ . We can obtain

$$\begin{aligned} P(\sup_{m \geq n} \|Z_m^{(k)}(Z) - Z\|_2 > \delta) &\leq P(\{\sup_{m \geq n} \|Z_m^{(k)}(Z) - Z\|_2 > \delta\} \cap \{Z \in G\}) + P(Z \in G^c) \\ &= \int_G P(\sup_{m \geq n} \|Z_m^{(k)}(z) - z\|_2 > \delta) p(z) dz + P(Z \in G^c) \\ &\leq \int_G \sum_{m \geq n} P(Z_m^{(k)}(z) \notin S_z(\delta)) p(z) dz + P(Z \in G^c). \quad (11) \end{aligned}$$

325 First, consider the first term of (11). We have

$$\begin{aligned} P(Z_m^{(k)}(z) \notin S_z(\delta)) &= P(Z_m^{(1)}(z), Z_m^{(2)}(z), \dots, Z_m^{(m)}(z) \notin S_z(\delta)) \\ &\quad + P(Z_m^{(1)}(z) \in S_z(\delta), Z_m^{(2)}(z), \dots, Z_m^{(m)}(z) \notin S_z(\delta)) \\ &\quad + P(Z_m^{(1)}(z), Z_m^{(2)}(z) \in S_z(\delta), Z_m^{(3)}(z), \dots, Z_m^{(m)}(z) \notin S_z(\delta)) \\ &\quad + \dots + P(Z_m^{(1)}(z), \dots, Z_m^{(k-1)}(z) \in S_z(\delta), Z_m^{(k)}(z), \dots, Z_m^{(m)}(z) \notin S_z(\delta)). \end{aligned}$$

326 By setting  $P(Z \in S_z(\delta)) = \gamma$ , we have

$$\begin{aligned} P(Z_m^{(k)}(z) \notin S_z(\delta)) &= (1 - \gamma)^m + C_m^1 \gamma (1 - \gamma)^{m-1} + C_m^2 \gamma^2 (1 - \gamma)^{m-2} + \dots \\ &\quad + C_m^{k-1} \gamma^{k-1} (1 - \gamma)^{m-k+1}. \quad (12) \end{aligned}$$

327 Consider the  $j$ -th term of (12). Let  $C_1 := \gamma^j / j!$ ,  $C_2 := C_1 e^j$  and  $C_3 := C_2 e^j (1 - \gamma)^{-j}$ . By using  
328 Stirling's approximation, we have

$$\begin{aligned} \lim_{m \rightarrow \infty} C_m^j \gamma^j (1 - \gamma)^{m-j} &= \lim_{m \rightarrow \infty} \frac{m!}{(m-j)! j!} \gamma^j (1 - \gamma)^{m-j} \\ &= \lim_{m \rightarrow \infty} C_1 \frac{\sqrt{2\pi m} (\frac{m}{e})^m}{\sqrt{2\pi(m-j)} (\frac{m-j}{e})^{m-j}} (1 - \gamma)^{m-j} \\ &= \lim_{m \rightarrow \infty} C_2 \sqrt{\frac{m}{(m-j)}} \frac{m^m}{(m-j)^{m-j}} (1 - \gamma)^{m-j} \\ &= \lim_{m \rightarrow \infty} C_2 e^j (m+j)^j (1 - \gamma)^m \\ &= \lim_{m \rightarrow \infty} C_2 e^j m^j (1 - \gamma)^{m-j} \\ &= \lim_{m \rightarrow \infty} C_3 m^j (1 - \gamma)^m. \end{aligned}$$

Thus, there exists  $C_4 > 0$  such that  $P(Z_m^{(k)}(z) \notin S_z(\delta)) \leq C_4 m^{k-1} (1-\gamma)^m$  when  $m$  is large enough. It holds that

$$\frac{C_4 m^{k-1} (1-\gamma)^m}{m^{-2}} = C_4 m^{k+1} (1-\gamma)^m \rightarrow 0, \quad \text{as } m \rightarrow +\infty.$$

Thus, for  $z \in G$  and  $n$  large enough,  $\forall \delta > 0$ , we have  $P(Z_m^{(k)}(z) \notin S_z(\delta)) = o(m^{-2})$  and

$$\sum_{m \geq n} P(Z_m^{(k)}(z) \notin S_z(\delta)) \leq \sum_{m \geq n} \frac{1}{m^2},$$

which shows  $\lim_{n \rightarrow \infty} \sum_{m \geq n} P(Z_m^{(k)}(z) \notin S_z(\delta)) = 0$  for  $z \in G$ . So by Lebesgue dominated convergence theorem, we obtain  $\lim_{n \rightarrow \infty} \int_G \sum_{m \geq n} P(Z_m^{(k)}(z) \notin S_z(\delta)) p(z) dz = 0$ .

Second, we consider the second term of (11). To prove that  $P(Z \in G^c) = 0$ , we aim to construct a countable open cover of  $G^c$  and show that the probability of the random vector  $Z$  falling into each of these open balls is zero. By the property of  $G^c$ , for every  $z \in G^c$ , there exists  $r_z > 0$  such that for all  $r < r_z$ ,  $P(Z \in S_z(r)) = 0$ . Furthermore, using the separability of Euclidean space and the density of the rational number set, we can approximate  $z$  using points from  $\mathbb{Q}^{d_z}$  with  $\mathbb{Q}$  being the rational number set. Therefore, for every  $z \in G^c$ , there exist  $x \in \mathbb{Q}^{d_z} \cap S_z(\frac{r_z}{3})$  and  $r \in \mathbb{Q} \cap (\frac{r_z}{3}, \frac{2r_z}{3})$ , such that  $z \in S_x(r) \subseteq S_z(r_z)$ . Because  $P(Z \in S_z(r_z)) = 0$ , we conclude that  $P(Z \in S_x(r)) = 0$ . Define

$$\mathcal{F} := \{S_x(r) \mid \exists z \in G^c, \text{ such that } z \in S_x(r) \subseteq S_z(r_z) \text{ with } x \in \mathbb{Q}^{d_z} \text{ and } r \in \mathbb{Q}\}.$$

Note that the elements in set  $\mathcal{F}$  are mutually distinct. By the construction of  $S_x(r)$ ,  $\mathcal{F}$  forms a countable open cover of  $G^c$ , and the probability of  $Z$  falling into each open ball in  $\mathcal{F}$  is zero. Using the monotonicity and countable additivity properties of probability, we have  $P(Z \in G^c) \leq P(Z \in \cup_{S_x(r) \in \mathcal{F}} S_x(r)) \leq \sum_{S_x(r) \in \mathcal{F}} P(Z \in S_x(r)) = 0$ . Thus, we conclude that  $P(Z \in G^c) = 0$ .

We therefore conclude that,  $\forall \delta > 0$ ,  $\lim_{n \rightarrow \infty} P(\sup_{m \geq n} \|Z_m^{(k)}(Z) - Z\|_2 > \delta) = 0$ . This finish the proof.

## A.2 Proof of Theorem 2

*Proof.* By Pinsker's inequality, we have

$$d_{TV}\{p(x|Z), \hat{p}(x|Z)\} \leq \sqrt{D_{KL}\{p(x|Z), \hat{p}(x|Z)\}/2}.$$

Note that  $I\{\xi = 1\} + \dots + I\{\xi = k\} = 1$ . By the definition of  $\hat{p}(x|Z)$ , we obtain

$$\begin{aligned} D_{KL}\{p(x|Z), \hat{p}(x|Z)\} &= \int p(x|Z) \log \left\{ \frac{p(x|Z)}{p(x|Z_n^{(1)})^{I\{\xi=1\}} \times \dots \times p(x|Z_n^{(k)})^{I\{\xi=k\}}} \right\} dx \\ &= \int p(x|Z) \log \prod_{l=1}^k \frac{p(x|Z)^{I\{\xi=l\}}}{p(x|Z_n^{(l)})^{I\{\xi=l\}}} dx \\ &= \sum_{l=1}^k I\{\xi = l\} \int p(x|Z) \log \frac{p(x|Z)}{p(x|Z_n^{(l)})} dx \\ &= \sum_{l=1}^k I\{\xi = l\} D_{KL}\{p(x|Z) \| p(x|Z_n^{(l)})\}. \end{aligned}$$

Then, by Taylor's expansion, we have

$$\begin{aligned} &D_{KL}\{p(x|Z) \| p(x|Z_n^{(l)})\} \\ &= D_{KL}\{p(x|Z) \| p(x|Z)\} + \frac{\partial}{\partial z'} D_{KL}\{p(x|Z) \| p(x|z')\} \Big|_{z'=Z} (Z_n^{(l)} - Z) \\ &\quad + \frac{1}{2} (Z_n^{(l)} - Z)^T \frac{\partial^2}{\partial z' \partial z'^T} D_{KL}\{p(x|Z) \| p(x|z')\} \Big|_{z'=a} (Z_n^{(l)} - Z), \end{aligned}$$

343 where  $a = \lambda Z + (1 - \lambda)Z_n^{(l)}$  with  $0 \leq \lambda \leq 1$ .

344 Note that  $D_{KL}\{p(x|Z)||p(x|Z)\} = \int p(x|Z) \log \frac{p(x|Z)}{p(x|Z)} dx = 0$ . By Lemma 1 and Assumptions 1  
345 and 2, we have

$$\begin{aligned} \frac{\partial}{\partial z'} D_{KL}\{p(x|Z)||p(x|z')\} \Big|_{z'=Z} &= - \int p(x|Z) \cdot \frac{\partial}{\partial z'} \log p(x|z') \Big|_{z'=Z} dx \\ &= - \frac{\partial}{\partial z'} \int p(x|z') dx \Big|_{z'=Z} = 0 \end{aligned}$$

346 and

$$\frac{\partial^2}{\partial z' \partial z'^T} D_{KL}\{p(x|Z)||p(x|z')\} \Big|_{z'=a} = - \int p(x|Z) \cdot \frac{\partial^2}{\partial z' \partial z'^T} \log p(x|z') \Big|_{z'=a} dx = I_a(Z).$$

347 This means

$$D_{KL}\{p(x|Z)||p(x|Z_n^{(l)})\} = \frac{1}{2}(Z_n^{(l)} - Z)^T I_a(Z)(Z_n^{(l)} - Z).$$

348 Note that  $Z_n^{(l)} \rightarrow Z$  a.s. implies that  $Z_n^{(l)}$  converges to  $Z$  in probability. Then  $\forall \delta > 0$ , for  $\epsilon$  defined  
349 in Assumption 1, we have

$$\begin{aligned} P(D_{KL}\{p(x|Z)||p(x|Z_n^{(l)})\} > \delta) &\leq P(\{D_{KL}\{p(x|Z)||p(x|Z_n^{(l)})\} > \delta\} \cap \{\|Z_n^{(l)} - Z\|_2 \leq \epsilon\}) \\ &\quad + P(\|Z_n^{(l)} - Z\|_2 > \epsilon) \\ &\leq P\left(\frac{1}{2}\beta\|Z_n^{(l)} - Z\|_2^2 > \delta\right) + P(\|Z_n^{(l)} - Z\|_2 > \epsilon) \\ &= o(1). \end{aligned}$$

350 Thus,  $D_{KL}\{p(x|Z)||p(x|Z_n^{(l)})\} = o_p(1)$ .

351 Because  $I\{\xi = l\} \leq 1$  for  $l = 1, 2, \dots, k$ , and  $k$  is finite, we obtain

$$D_{KL}\{p(x|Z), \hat{p}(x|Z)\} = \sum_{l=1}^k I\{\xi = l\} D_{KL}\{p(x|Z)||p(x|Z_n^{(l)})\} = o_p(1).$$

352 Finally, we conclude that  $d_{TV}\{p(x|Z), \hat{p}(x|Z)\} \leq \sqrt{D_{KL}\{p(x|Z), \hat{p}(x|Z)\}/2} = o_p(1)$ .

### 353 A.3 Proof of Theorem 3

354 To prove Theorem 3, the following two lemmas are needed.

**Lemma 5.** Let  $\dot{X}$  be drawn from  $\hat{p}(\cdot|Z)$ , independently of  $Y$ .  $\dot{X}^{(1)}, \dots, \dot{X}^{(B)}$  are i.i.d. samples drawn from the  $k$ -nearest-neighbor local sampling mechanism based on  $(\dot{X}, Y, Z)$ . For any statistic  $T$ , the  $B + 1$  statistics

$$T(\dot{X}, Y, Z), T(\dot{X}^{(1)}, Y, Z), \dots, T(\dot{X}^{(B)}, Y, Z)$$

355 are exchangeable conditionally on  $Y$  and  $Z$ .

356 *Proof.* We have that the  $B+1$  triples  $(\dot{X}, Y, Z), (\dot{X}^{(1)}, Y, Z), \dots, (\dot{X}^{(B)}, Y, Z)$  are i.i.d. samples  
357 drawn from the same mechanism after conditionally on  $\dot{X}_0, Y$  and  $Z$ , where  $\dot{X}_0$  is the order statistic  
358 of  $\dot{X}$ . Note that,  $T$  is measurable. Thus,  $T(\dot{X}, Y, Z), T(\dot{X}^{(1)}, Y, Z), \dots, T(\dot{X}^{(B)}, Y, Z)$  are  
359 i.i.d. after conditionally on  $\dot{X}_0, Y$  and  $Z$ . Conditionally on  $\dot{X}_0, Y$  and  $Z$ , denote their cumulative  
360 conditional distribution as  $F(\cdot|\dot{X}_0, Y, Z)$ . Denote  $\dot{X}$  as  $\dot{X}^{(0)}$ . Then, for any  $t_0, \dots, t_B \in \mathbb{R}$  and

any permutation  $\pi = (\pi_{(0)}, \dots, \pi_{(B)})$  of the indices  $\{0, 1, \dots, B\}$ , we have

$$\begin{aligned}
& P(T(\dot{\mathbf{X}}^{(0)}, \mathbf{Y}, \mathbf{Z}) \leq t_0, T(\dot{\mathbf{X}}^{(1)}, \mathbf{Y}, \mathbf{Z}) \leq t_1, \dots, T(\dot{\mathbf{X}}^{(B)}, \mathbf{Y}, \mathbf{Z}) \leq t_B | \mathbf{Y}, \mathbf{Z}) \\
&= E_{\dot{\mathbf{X}}_{(0)} | \mathbf{Y}, \mathbf{Z}} \{P(T(\dot{\mathbf{X}}^{(0)}, \mathbf{Y}, \mathbf{Z}) \leq t_0, T(\dot{\mathbf{X}}^{(1)}, \mathbf{Y}, \mathbf{Z}) \leq t_1, \dots, T(\dot{\mathbf{X}}^{(B)}, \mathbf{Y}, \mathbf{Z}) \leq t_B | \dot{\mathbf{X}}_{(0)}, \mathbf{Y}, \mathbf{Z})\} \\
&= E_{\dot{\mathbf{X}}_{(0)} | \mathbf{Y}, \mathbf{Z}} \{P(T(\dot{\mathbf{X}}^{(0)}, \mathbf{Y}, \mathbf{Z}) \leq t_0 | \dot{\mathbf{X}}_{(0)}, \mathbf{Y}, \mathbf{Z}), \dots, P(T(\dot{\mathbf{X}}^{(B)}, \mathbf{Y}, \mathbf{Z}) \leq t_B | \dot{\mathbf{X}}_{(0)}, \mathbf{Y}, \mathbf{Z})\} \\
&= E_{\dot{\mathbf{X}}_{(0)} | \mathbf{Y}, \mathbf{Z}} \left\{ \prod_{i=0}^B F(t_i | \dot{\mathbf{X}}_{(0)}, \mathbf{Y}, \mathbf{Z}) \right\} \\
&= E_{\dot{\mathbf{X}}_{(0)} | \mathbf{Y}, \mathbf{Z}} \{P(T(\dot{\mathbf{X}}^{(\pi_{(0)})}, \mathbf{Y}, \mathbf{Z}) \leq t_0, \dots, T(\dot{\mathbf{X}}^{(\pi_{(B)})}, \mathbf{Y}, \mathbf{Z}) \leq t_B | \dot{\mathbf{X}}_{(0)}, \mathbf{Y}, \mathbf{Z})\} \\
&= P(T(\dot{\mathbf{X}}^{(\pi_{(0)})}, \mathbf{Y}, \mathbf{Z}) \leq t_0, \dots, T(\dot{\mathbf{X}}^{(\pi_{(B)})}, \mathbf{Y}, \mathbf{Z}) \leq t_B | \mathbf{Y}, \mathbf{Z}).
\end{aligned}$$

Thus, the desired result follows.

Let  $\stackrel{d}{=}$  denotes equality in distribution. We present the following Lemma:

**Lemma 6.** For any two bi-tuples  $(\mathbf{U}, \mathbf{V})$  and  $(\mathbf{U}', \mathbf{V}')$ , if  $\forall \mathbf{u}, (\mathbf{V} | \mathbf{U} = \mathbf{u}) \stackrel{d}{=} (\mathbf{V}' | \mathbf{U}' = \mathbf{u})$ , we have  $d_{TV}\{(\mathbf{U}, \mathbf{V}), (\mathbf{U}', \mathbf{V}')\} = d_{TV}(\mathbf{U}, \mathbf{U}')$ .

*Proof.* Denote the joint density functions of  $(\mathbf{U}, \mathbf{V})$  and  $(\mathbf{U}', \mathbf{V}')$  by  $p_{\mathbf{U}, \mathbf{V}}(\mathbf{u}, \mathbf{v})$  and  $p_{\mathbf{U}', \mathbf{V}'}(\mathbf{u}', \mathbf{v}')$ , respectively. According to the equivalent definition of the TV distance, we obtain

$$\begin{aligned}
d_{TV}\{(\mathbf{U}, \mathbf{V}), (\mathbf{U}', \mathbf{V}')\} &= \frac{1}{2} \iint |p_{\mathbf{U}, \mathbf{V}}(\mathbf{u}, \mathbf{v}) - p_{\mathbf{U}', \mathbf{V}'}(\mathbf{u}, \mathbf{v})| d\mathbf{u} d\mathbf{v} \\
&= \frac{1}{2} \iint |p_{\mathbf{V} | \mathbf{U}}(\mathbf{v} | \mathbf{u}) p_{\mathbf{U}}(\mathbf{u}) - p_{\mathbf{V}' | \mathbf{U}'}(\mathbf{v} | \mathbf{u}) p_{\mathbf{U}'}(\mathbf{u})| d\mathbf{u} d\mathbf{v} \\
&= \frac{1}{2} \iint p_{\mathbf{V} | \mathbf{U}}(\mathbf{v} | \mathbf{u}) |p_{\mathbf{U}}(\mathbf{u}) - p_{\mathbf{U}'}(\mathbf{u})| d\mathbf{u} d\mathbf{v} \\
&= \frac{1}{2} \int \left[ \int p_{\mathbf{V} | \mathbf{U}}(\mathbf{v} | \mathbf{u}) d\mathbf{v} \right] |p_{\mathbf{U}}(\mathbf{u}) - p_{\mathbf{U}'}(\mathbf{u})| d\mathbf{u} \\
&= \frac{1}{2} \int |p_{\mathbf{U}}(\mathbf{u}) - p_{\mathbf{U}'}(\mathbf{u})| d\mathbf{u} \\
&= d_{TV}(\mathbf{U}, \mathbf{U}').
\end{aligned}$$

Now we present the proof of Theorem 3:

*Proof.* Let  $\widetilde{\mathbf{X}}^{(1)}, \dots, \widetilde{\mathbf{X}}^{(B)}$  be i.i.d. drawn from the  $k$ -nearest-neighbor local sampling mechanism, see Algorithm 3. Now let  $\dot{\mathbf{X}}$  be an additional sample drawn from  $\widehat{p}(\cdot | \mathbf{Z})$  independently of  $\mathbf{Y}$ . Let  $\dot{\mathbf{X}}^{(1)}, \dots, \dot{\mathbf{X}}^{(B)}$  be i.i.d. drawn from the  $k$ -nearest-neighbor local sampling mechanism after we observe  $\dot{\mathbf{X}}$  instead of  $\mathbf{X}$ . Because  $(\dot{\mathbf{X}}^{(1)}, \dots, \dot{\mathbf{X}}^{(B)})$ , conditionally on  $\dot{\mathbf{X}}, \mathbf{Y}$  and  $\mathbf{Z}$ , is generated from the same mechanism as  $(\widetilde{\mathbf{X}}^{(1)}, \dots, \widetilde{\mathbf{X}}^{(B)})$ , conditionally on  $\mathbf{X}, \mathbf{Y}$  and  $\mathbf{Z}$ , for all  $\mathbf{x} \in \mathbb{R}^n$ , we have

$$((\widetilde{\mathbf{X}}^{(1)}, \dots, \widetilde{\mathbf{X}}^{(B)}) | \mathbf{X} = \mathbf{x}, \mathbf{Y}, \mathbf{Z}) \stackrel{d}{=} ((\dot{\mathbf{X}}^{(1)}, \dots, \dot{\mathbf{X}}^{(B)}) | \dot{\mathbf{X}} = \mathbf{x}, \mathbf{Y}, \mathbf{Z}).$$

Then, by applying Lemma 6, we obtain

$$\begin{aligned}
& d_{TV}\{(\mathbf{X}, \widetilde{\mathbf{X}}^{(1)}, \dots, \widetilde{\mathbf{X}}^{(B)} | \mathbf{Y}, \mathbf{Z}), (\dot{\mathbf{X}}, \dot{\mathbf{X}}^{(1)}, \dots, \dot{\mathbf{X}}^{(B)} | \mathbf{Y}, \mathbf{Z})\} \\
&= d_{TV}\{(\mathbf{X} | \mathbf{Y}, \mathbf{Z}), (\dot{\mathbf{X}} | \mathbf{Y}, \mathbf{Z})\} = d_{TV}\{p(\cdot | \mathbf{Z}), \widehat{p}(\cdot | \mathbf{Z})\}.
\end{aligned}$$

Define  $\chi_\alpha^B := \left\{ (\mathbf{x}, \mathbf{x}^{(1)}, \dots, \mathbf{x}^{(B)}) \mid \left[ 1 + \sum_{b=1}^B 1\{T(\mathbf{x}^{(b)}, \mathbf{Y}, \mathbf{Z}) \geq T(\mathbf{x}, \mathbf{Y}, \mathbf{Z})\} \right] / (1 + B) \leq \alpha \right\}$ , where  $1(\cdot)$  is the indicator function. Note that in our case, the statistic  $T$  is selected to be  $\widehat{\text{CMI}}$ . Then,

378 it follows that

$$\begin{aligned}
P(p \leq \alpha | \mathbf{Y}, \mathbf{Z}) &= P((\mathbf{X}, \widetilde{\mathbf{X}}^{(1)}, \dots, \widetilde{\mathbf{X}}^{(B)}) \in \chi_\alpha^B | \mathbf{Y}, \mathbf{Z}) \\
&= P((\dot{\mathbf{X}}, \dot{\mathbf{X}}^{(1)}, \dots, \dot{\mathbf{X}}^{(B)}) \in \chi_\alpha^B | \mathbf{Y}, \mathbf{Z}) + P((\mathbf{X}, \widetilde{\mathbf{X}}^{(1)}, \dots, \widetilde{\mathbf{X}}^{(B)}) \in \chi_\alpha^B | \mathbf{Y}, \mathbf{Z}) \\
&\quad - P((\dot{\mathbf{X}}, \dot{\mathbf{X}}^{(1)}, \dots, \dot{\mathbf{X}}^{(B)}) \in \chi_\alpha^B | \mathbf{Y}, \mathbf{Z}) \\
&\leq P((\dot{\mathbf{X}}, \dot{\mathbf{X}}^{(1)}, \dots, \dot{\mathbf{X}}^{(B)}) \in \chi_\alpha^B | \mathbf{Y}, \mathbf{Z}) \\
&\quad + d_{TV}\{(\mathbf{X}, \widetilde{\mathbf{X}}^{(1)}, \dots, \widetilde{\mathbf{X}}^{(B)} | \mathbf{Y}, \mathbf{Z}), (\dot{\mathbf{X}}, \dot{\mathbf{X}}^{(1)}, \dots, \dot{\mathbf{X}}^{(B)} | \mathbf{Y}, \mathbf{Z})\} \\
&= P((\dot{\mathbf{X}}, \dot{\mathbf{X}}^{(1)}, \dots, \dot{\mathbf{X}}^{(B)}) \in \chi_\alpha^B | \mathbf{Y}, \mathbf{Z}) + d_{TV}\{p(\cdot | \mathbf{Z}), \widehat{p}(\cdot | \mathbf{Z})\}.
\end{aligned}$$

379 Applying Lemma 5 and the property of rank test, we obtain  $P((\dot{\mathbf{X}}, \dot{\mathbf{X}}^{(1)}, \dots, \dot{\mathbf{X}}^{(B)}) \in \chi_\alpha^B | \mathbf{Y}, \mathbf{Z}) \leq$   
380  $\alpha$ . Finally, we have  $P(p \leq \alpha | \mathbf{Y}, \mathbf{Z}) \leq \alpha + d_{TV}\{p(\cdot | \mathbf{Z}), \widehat{p}(\cdot | \mathbf{Z})\}$ .

Because the TV distance is bounded by 1, marginalizing the above inequality over  $\mathbf{Y}$  and  $\mathbf{Z}$  and applying Theorem 2 and Lebesgue dominated convergence theorem lead to

$$P(p \leq \alpha | H_0) \leq \alpha + E(d_{TV}\{p(\cdot | \mathbf{Z}), \widehat{p}(\cdot | \mathbf{Z})\}) = \alpha + o(1).$$

#### 381 A.4 Proof of Theorem 4

Here we present the assumptions given in [6] that ensure the consistency of CMI estimator. We denote the point  $(x, y, z)$  as  $\omega \in \mathbb{R}^{d_x} \times \mathbb{R}^{d_y} \times \mathbb{R}^{d_z}$ . Let  $f(\omega) = p(x, y, z)$  be the joint density function of  $(X, Y, Z)$ ,  $g(\omega) = p(x, z)p(y | z)$  be the joint density function of  $(X, Y, Z)$  under  $H_0$ , and  $\phi(\omega) = \phi(x, y, z)$  be the joint density of  $(X, Y', Z)$  produced by Algorithm 1. The classifier in Algorithm 2 is trained using the label probability  $\gamma_\theta(\omega) := P_\theta(l = 1 | \omega)$  with parameter  $\theta$ . According to Algorithm 2,  $P(l = 1) = P(l = 0) = 1/2$ . Define the population binary-cross entropy loss over the joint distribution of data and label as

$$\text{BCE}(\gamma_\theta) = -\{E_{Wl}(l \log \gamma_\theta(W) + (1 - l) \log(1 - \gamma_\theta(W)))\}.$$

382 Let  $\gamma'(\omega) := \gamma_{\theta'}(\omega)$  be the point-wise minimizer of binary-cross entropy loss based on  $f(\omega)$  and  
383  $\phi(\omega)$ , and  $\gamma''(\omega) := \gamma_{\theta''}(\omega)$  be the point-wise minimizer of binary-cross entropy loss based on  $f(\omega)$   
384 and  $g(\omega)$ .

385 **Assumption (A1):**  $f(\cdot)$  and  $\phi(\cdot)$  admit densities in a compact subset  $\mathcal{W} \subset \mathbb{R}^{d_x} \times \mathbb{R}^{d_y} \times \mathbb{R}^{d_z}$ .

386 **Assumption (A2):** For some constant  $\alpha, \zeta > 0$ ,  $\alpha \leq f(\omega)$ ,  $\phi(\omega) \leq \zeta$ ,  $\forall \omega$ .

387 **Assumption (A3):**  $\gamma'(\omega), \gamma''(\omega) \in [\tau, 1 - \tau]$  and clip predictions such that  $\gamma_\theta(\omega) \in [\tau, 1 - \tau] \forall \omega, \theta$ ,  
388 with  $0 < \tau \leq \alpha/(\alpha + \zeta)$ .

389 **Assumption (A4):** The classifier class  $\mathcal{C}_\theta$  is parametrized by  $\theta$  within a compact domain  $\Theta \subset \mathbb{R}^h$ .  
390 There exists a constant  $K$  such that  $\|\theta\|_2 \leq K$ , and the classifier's output is  $L$ -Lipschitz with respect  
391 to  $\theta$ .

392 **Assumption (A5):**  $\int p(z)^{1-1/d} dz \leq C_5$ ,  $\forall d \geq 2$ , where  $C_5$  is a constant.

393 We denote the CMI estimator  $\widehat{\text{CMI}}$  based on Algorithm 2 as  $\widehat{D}_{KL}^{(n)}(f || \phi)$ . The true CMI of  $(X, Y, Z)$   
394 is  $\text{CMI} := I(X; Y | Z) = D_{KL}(f || g)$ . Then we have the following Lemma:

395 **Lemma 7.** Under Assumptions 1 and 2 and (A1)-(A5), we have  $\widehat{D}_{KL}^{(n)}(f || \phi) \xrightarrow{P} D_{KL}(f || g)$ .

396 *Proof.* By the definition of convergence in probability, it is sufficient to prove  $\forall \delta > 0, \forall \eta > 0, \exists N$ ,  
397 when  $n > N$ ,  $P(|\widehat{D}_{KL}^{(n)}(f || \phi) - D_{KL}(f || g)| > \delta) < \eta$ .

398 Note that

$$\begin{aligned}
&P(|\widehat{D}_{KL}^{(n)}(f || \phi) - D_{KL}(f || g)| > \delta) \\
&= P(|\widehat{D}_{KL}^{(n)}(f || \phi) - D_{KL}(f || \phi) + D_{KL}(f || \phi) - D_{KL}(f || g)| > \delta).
\end{aligned}$$

399 Applying Theorem 1 in [6], we have  $\widehat{D}_{KL}^{(n)}(f || \phi) - D_{KL}(f || \phi) \xrightarrow{P} 0$ , which means for  $\delta/2 > 0$  and  
400  $\eta > 0$ ,  $\exists N_1$ , when  $n > N_1$ ,  $P(|\widehat{D}_{KL}^{(n)}(f || \phi) - D_{KL}(f || \phi)| > \delta/2) < \eta$ .

401 Now consider the term  $D_{KL}(f||\phi) - D_{KL}(f||g)$ . Applying Lemma 3 in [6], we have  $\gamma'(\omega)/\{1 -$   
 402  $\gamma'(\omega)\} = f(\omega)/\phi(\omega)$  and  $\gamma''(\omega)/\{1 - \gamma''(\omega)\} = f(\omega)/g(\omega)$ . Then, by the definition of KL  
 403 divergence, it follows that

$$\begin{aligned}
 |D_{KL}(f||\phi) - D_{KL}(f||g)| &= \left| E_{f(\omega)} \log \frac{f(\omega)}{\phi(\omega)} - E_{f(\omega)} \log \frac{f(\omega)}{g(\omega)} \right| \\
 &= \left| E_{f(\omega)} \left( \log \frac{\gamma'(\omega)}{1 - \gamma'(\omega)} - \log \frac{\gamma''(\omega)}{1 - \gamma''(\omega)} \right) \right| \\
 &\leq E_{f(\omega)} \left| \log \frac{1 - \gamma'(\omega)}{\gamma'(\omega)} - \log \frac{1 - \gamma''(\omega)}{\gamma''(\omega)} \right| \\
 &\leq \frac{1 - \tau}{\tau} E_{f(\omega)} \left| \frac{1 - \gamma'(\omega)}{\gamma'(\omega)} - \frac{1 - \gamma''(\omega)}{\gamma''(\omega)} \right| \\
 &= \frac{1 - \tau}{\tau} E_{f(\omega)} \left| \frac{\phi(\omega) - g(\omega)}{f(\omega)} \right| \\
 &= \frac{1 - \tau}{\tau} \iiint |\phi(x, y, z) - g(x, y, z)| dx dy dz \\
 &= \frac{2(1 - \tau)}{\tau} d_{TV}(\phi, g).
 \end{aligned}$$

404 The second inequality follows from Lagrange's mean value theorem and Assumption (A3).

Applying Theorem 1 in [9],  $\forall \epsilon_1 \leq \epsilon$  with  $\epsilon$  being defined in Assumption 1, we have  $d_{TV}(\phi, g) \leq b(n)$ ,  
 where

$$b(n) = \frac{1}{2} \sqrt{\frac{\beta C_5 2^{1/d_z} \Gamma(1/d_z)}{4 (n \gamma_{d_z})^{1/d_z} d_z} + \frac{\beta \epsilon_1 G(2c_{d_z} \epsilon_1^2)}{4}} + \exp \left( -\frac{1}{2} n \gamma_{d_z} c_{d_z} \epsilon_1^{d_z+2} \right) + G(2c_{d_z} \epsilon_1^2).$$

405 Here,  $\beta$  is defined in Assumption 1,  $C_5$  is defined in Assumption (A5),  $d_z$  is the dimension of  $Z$ ,  
 406  $\Gamma(\cdot)$  is the gamma function,  $\gamma_{d_z}$  is the volume of the unit radius  $l_2$  ball in  $\mathbb{R}^{d_z}$ ,  $c_{d_z}$  is defined in  
 407 Assumption 2, and  $\forall \delta > 0$ ,  $G(\delta) = P(p(Z) \leq \delta)$ .

408 Because  $\epsilon_1$  can be arbitrary small, we conclude that  $\lim_{n \rightarrow \infty} b(n) = 0$ . So we arrive at  
 409  $\lim_{n \rightarrow \infty} |D_{KL}(f||\phi) - D_{KL}(f||g)| = 0$ , which means for  $\delta/2 > 0$ ,  $\exists N_2$ , when  $n > N_2$ ,  
 410  $|D_{KL}(f||\phi) - D_{KL}(f||g)| < \delta/2$ .

411 Then for  $\delta > 0$  and  $\eta > 0$ , take  $N = \max(N_1, N_2)$ , when  $n > N$ ,

$$\begin{aligned}
 &P(|\widehat{D}_{KL}^{(n)}(f||\phi) - D_{KL}(f||\phi) + D_{KL}(f||\phi) - D_{KL}(f||g)| > \delta) \\
 &\leq P(|\widehat{D}_{KL}^{(n)}(f||\phi) - D_{KL}(f||\phi)| + |D_{KL}(f||\phi) - D_{KL}(f||g)| > \delta) \\
 &\leq P(|\widehat{D}_{KL}^{(n)}(f||\phi) - D_{KL}(f||\phi)| > \delta/2) < \eta
 \end{aligned}$$

412 holds. This finish the proof.

413 We therefore conclude that  $\widehat{\text{CMI}}$  is a consistent estimator of CMI. When considering  $\widehat{\text{CMI}}^{(b)}$  based  
 414 on the sample  $(\widetilde{X}^{(b)}, Y, Z)$  ( $b = 1, \dots, B$ ) drawn from the  $k$ -nearest-neighbor local sampling  
 415 mechanism as depicted in Algorithm 3, we can state: Under Assumptions 1, 2, (A1)-(A3) with  
 416  $f(\omega)$  and  $\phi(\omega)$  replaced by densities of the distribution of  $(\widetilde{X}, Y, Z)$  and the corresponding 1-NN  
 417 distribution, respectively, and Assumptions (A4)-(A5),  $\forall b = 1, \dots, B$ ,  $\widehat{\text{CMI}}^{(b)}$  is a consistent  
 418 estimator of  $\text{CMI}^{(b)}$ , where  $\text{CMI}^{(b)} = I(\widetilde{X}^{(b)}; Y|Z)$ . Now let's present the proof of Theorem 4.

419 *Proof.* Write  $P(\cdot|H_1)$  as  $P_{H_1}(\cdot)$ . By Markov inequality, it follows that

$$\begin{aligned}
P_{H_1}(p > \alpha) &= P_{H_1}\left(\frac{1 + \sum_{b=1}^{B_n} 1(\widehat{\text{CMI}}^{(b)} \geq \widehat{\text{CMI}})}{1 + B_n} > \alpha\right) \\
&\leq \frac{1}{\alpha(1 + B_n)} E_{H_1}\left(1 + \sum_{b=1}^{B_n} 1(\widehat{\text{CMI}}^{(b)} \geq \widehat{\text{CMI}})\right) \\
&= \frac{1}{\alpha(1 + B_n)} + \frac{B_n}{\alpha(1 + B_n)} P_{H_1}(\widehat{\text{CMI}}^{(1)} \geq \widehat{\text{CMI}}) \\
&\leq \frac{1}{\alpha(1 + B_n)} + \frac{1}{\alpha} P_{H_1}(\widehat{\text{CMI}}^{(1)} \geq \widehat{\text{CMI}}).
\end{aligned}$$

420 Because  $\tilde{X}^{(1)} \perp\!\!\!\perp Y|Z$ ,  $\text{CMI}^{(1)} = I(\tilde{X}^{(1)}; Y|Z) = 0$ . Then,  $\forall \delta > 0$ ,

$$\begin{aligned}
P_{H_1}(\widehat{\text{CMI}}^{(1)} \geq \widehat{\text{CMI}}) &\leq P_{H_1}(\{\widehat{\text{CMI}} \leq \widehat{\text{CMI}}^{(1)}\} \cap \{|\widehat{\text{CMI}}^{(1)} - \text{CMI}^{(1)}| \leq \delta\}) \\
&\quad + P_{H_1}(|\widehat{\text{CMI}}^{(1)} - \text{CMI}^{(1)}| > \delta) \\
&\leq P_{H_1}(\widehat{\text{CMI}} \leq \delta) + P_{H_1}(|\widehat{\text{CMI}}^{(1)} - \text{CMI}^{(1)}| > \delta).
\end{aligned}$$

421 Next, we have

$$\begin{aligned}
P_{H_1}(\widehat{\text{CMI}} \leq \delta) &\leq P_{H_1}(\{\widehat{\text{CMI}} \leq \delta\} \cap \{|\widehat{\text{CMI}} - \text{CMI}| \leq \delta\}) + P_{H_1}(|\widehat{\text{CMI}} - \text{CMI}| > \delta) \\
&\leq P_{H_1}(\text{CMI} - \delta \leq \widehat{\text{CMI}} \leq \delta) + P_{H_1}(|\widehat{\text{CMI}} - \text{CMI}| > \delta).
\end{aligned}$$

422 Thus, we conclude that

$$\begin{aligned}
P_{H_1}(p \leq \alpha) &\geq 1 - \frac{1}{\alpha(1 + B_n)} - \frac{1}{\alpha} [P_{H_1}(\text{CMI} - \delta \leq \widehat{\text{CMI}} \leq \delta) \\
&\quad + P_{H_1}(|\widehat{\text{CMI}} - \text{CMI}| > \delta) + P_{H_1}(|\widehat{\text{CMI}}^{(1)} - \text{CMI}^{(1)}| > \delta)].
\end{aligned}$$

Under  $H_1$ ,  $\text{CMI} > 0$ . Take  $\delta = \text{CMI}/4 > 0$ , we obtain

$$\lim_{n \rightarrow \infty} P_{H_1}(p \leq \alpha) \rightarrow 1.$$

## 423 B Additional Empirical Results

### 424 B.1 The choice of the neighbor order $k$

425 To investigate the impact of the parameter  $k$  on our proposed approach, we employ a linear uniform  
426 model. To accomplish this, we generate synthetic data in the following manner:

$$\begin{aligned}
H_0 : X &= \epsilon_x, \quad Y = \epsilon_y, \quad \text{and} \quad Z \sim \text{Uniform}(-1, 1), \\
H_1 : X &= \epsilon_x, \quad Y = \alpha X + 0.5\epsilon_y, \quad \text{and} \quad Z \sim \text{Uniform}(-1, 1),
\end{aligned} \tag{13}$$

427 where  $\epsilon_x$  and  $\epsilon_y$  are generated independently from the uniform distribution over the interval  $[-1, 1]$ .  
428 The parameter  $\alpha$  is randomly generated within the range of  $[0, 2]$ . As is shown in Figure 3, our  
429 method achieves effective control of type I error and exhibits the highest power under  $H_1$  across all  
430 dimensions when  $k = 7$ . Therefore, we consistently set  $k = 7$  in all experiments.

### 431 B.2 Empirical results for Scenario (13)

432 We demonstrate the effectiveness of our approach and compare it with alternative methods in Scenario  
433 (13). The results are shown in Figure 4, which pertains to high-dimensional  $Z$ , and Figure 5, which  
434 focuses on low-dimensional  $Z$ . The results consistently demonstrate that our test achieves favorable  
435 performance in terms of the type I error and power under  $H_1$ . Although LPCIT, CMiknn, and  
436 NNSCIT effectively control the type I error, they exhibit noticeably lower power compared to our  
437 method, when the dimension exceeds 60, often by a substantial margin. Furthermore, KCIT, GCIT,  
438 and CCIT all yield high power under  $H_1$ , but they either always or sometimes suffer from inflated  
439 type I errors.

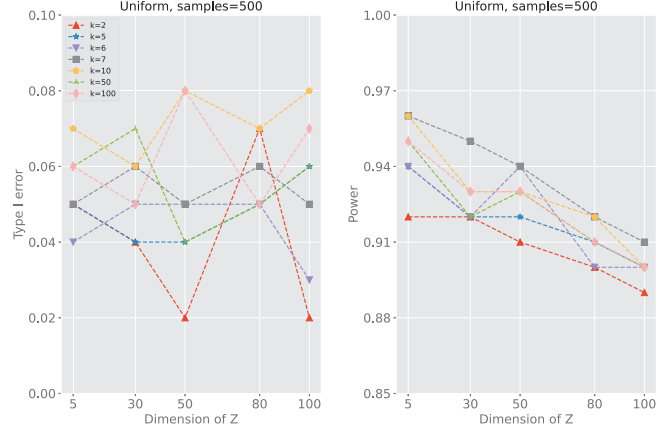

Figure 3: Comparison of the type I error (lower is better) and power under  $H_1$  (higher is better) for our test in Scenario (13) across different values of  $k$ .

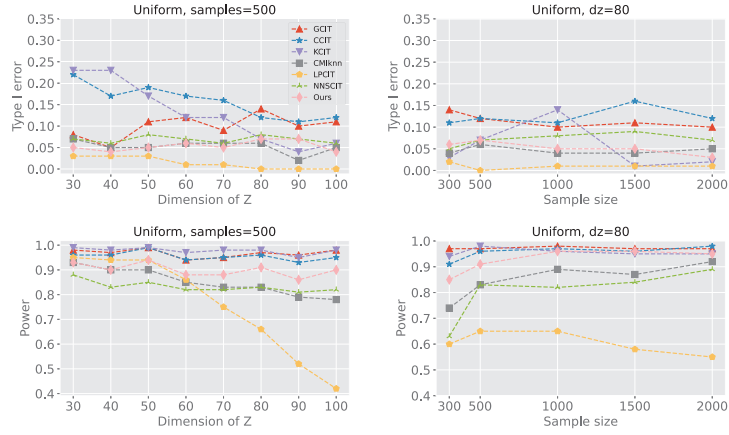

Figure 4: Comparison of the type I error (lower is better) and power under  $H_1$  (higher is better) of our test with SOTA tests in Scenario (13). **Left:** The results when varying the dimension of  $Z$ . **Right:** The results when varying the sample size.

### 440 B.3 Additional empirical results for Scenario I

441 In Figure 6, we present the type I error and power under  $H_1$  in low dimensions of  $Z$  ranging from  
 442 5 to 30 for Scenario I (Eq. (9)) with Gaussian or Laplace noises. It can be observed that our test  
 443 and LPCIT consistently achieve good and stable performance in terms of type I error and power  
 444 under  $H_1$ , when the dimensionality of  $Z$  is lower than 30. On the other hand, GCIT, CCIT, and KCIT  
 445 exhibit high power under  $H_1$  but fail to control the type I error. NNSCIT and CMiknn demonstrate  
 446 relatively good control of type I errors but lack sufficient power under  $H_1$ .

### 447 B.4 Computational efficiency analysis

448 Figure 7 shows the timing performance of all methods for a single test under Scenario I with Laplace  
 449 noises. Our test is found to be highly computationally efficient even when dealing with large  
 450 sample sizes and high-dimensional conditioning sets. In contrast, CMiknn and CCIT for sample



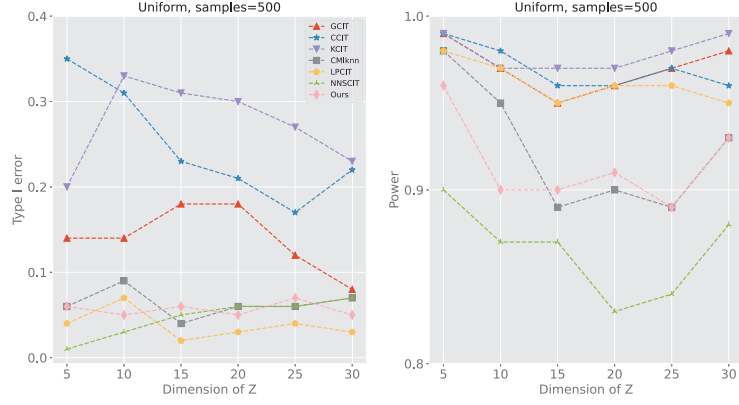

Figure 5: Comparison of the type I error (lower is better) and power under  $H_1$  (higher is better) of our test with six SOTA tests in Scenario (13).

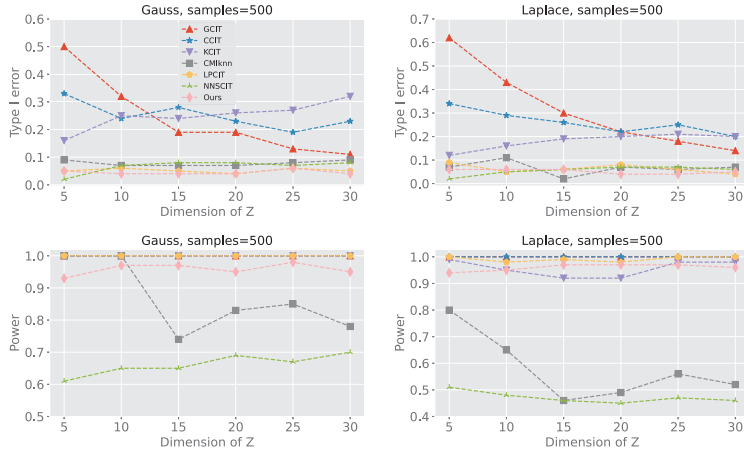

Figure 6: Comparison of the type I error (lower is better) and power under  $H_1$  (higher is better) of our method with six SOTA methods on the post-nonlinear model under Gaussian or Laplace distributions in Scenario I. **Left:** The results under Gaussian distribution. **Right:** The results under Laplace distribution.

451 sizes exceeding 1000, and LPCIT for dimension of  $Z$  higher than 50 are impractical due to their  
 452 prohibitively long running time.

### 453 B.5 The detailed experimental setup for Scenario III

454 For the chain structure  $Y \rightarrow Z \rightarrow X$ , we generate synthetic data as follows:

$$\begin{aligned} H_0 : Y &\sim N(1, 1), Z = Ya + \epsilon_1, X = Z^T b + \epsilon_2, \\ H_1 : Y &\sim N(1, 1), Z = Ya + \epsilon_1, X = Z^T b + Y + \epsilon_2, \end{aligned}$$

455 where  $a$  and  $b$  are both  $d_z$ -dimensional, the entries of  $a$  and  $b$  are both randomly and uniformly sampled  
 456 from  $[0, 0.3]$ ,  $\epsilon_1$  is generated from a  $d_z$ -dimensional standard multivariate Gaussian distribution, and  
 457  $\epsilon_2$  is sampled from a standard Gaussian distribution.

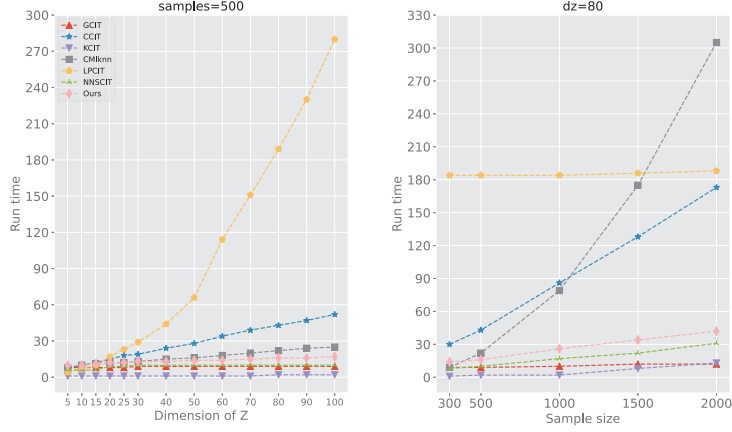

Figure 7: Running times in seconds as a function of sample size or dimension of  $Z$  on the post-nonlinear model under Laplace distribution in Scenario I. **Left:** The results when varying the dimension of  $Z$ . **Right:** The results when varying the sample size.

## C Real Data Analysis

In order to showcase the superior performance of our test, we conduct a comparative evaluation against other state-of-the-art (SOTA) CI tests using real datasets. We assess the effectiveness of our method along with six SOTA approaches on two specific datasets: the ABALONE dataset [1] and the Flow-Cytometry dataset [8].

### C.1 Real ABALONE dataset

The ABALONE dataset [1] comprises measurements obtained from a study conducted to predict the age of abalones based on their physical characteristics. The dataset is publicly available at the UCI Machine Learning Repository and can be downloaded from <https://archive.ics.uci.edu/ml/datasets/abalone>. In our evaluation, we consider the graph structure recovered by [4] as the ground truth, as depicted in Figure 4 of their paper. This graph represents the causal relationships among the 8 variables in the dataset. We specifically select 35 CI relations and 35 non-CI relations from this graph. The philosophy used is that a node  $X$  is independent of all other nodes  $Y$  in the graph when conditioned on its parents, children, and parents of children [2, 9]. Additionally, if there exists a direct edge between node  $X$  and node  $Y$  in the graph, they are never conditionally independent given any other set of variables. As a result, the conditioning set  $Z$  can be arbitrarily selected from the remaining nodes. The dataset consists of 4177 samples, and  $d_z$  varies from 1 to 6.

In order to evaluate the performance of various tests, we utilize precision, recall, and F-score as evaluation metrics. Precision is calculated as  $TP/(TP+FP)$ , where  $TP$  represents the number of true CI instances correctly identified, and  $FP$  represents the number of non-CI instances incorrectly identified as CI. Recall is calculated as  $TP/(TP+FN)$ , where  $FN$  represents the number of CI instances not identified. The F-score is then computed as the harmonic mean of precision and recall, given by  $2 \times \text{precision} \times \text{recall} / (\text{precision} + \text{recall})$  [3].  $TN$  represents the number of correctly identified true non-CI instances. Table 1 presents the results for all methods. It should be noted that we do not record the results for GCIT as it does not correctly identify any CI relations. Our approach successfully identifies 31 CI relations and 32 non-CI relations, achieving the highest F-score among the testing methods, while maintaining high precision and recall.

### C.2 Real Flow-Cytometry dataset

The Flow-Cytometry dataset is a widely used benchmark in the field of causal structure learning [7, 10]. This dataset captures the expression levels of proteins and phospholipids in human cells [8].

Table 1: The TP, TN, precision (pre), recall (rec) and F-score of our test and six SOTA methods for the real ABALONE dataset.

| Method | TP | TN | Pre    | Rec    | F-score |
|--------|----|----|--------|--------|---------|
| KCIT   | 5  | 35 | 1      | 0.1429 | 0.2501  |
| CCIT   | 12 | 34 | 0.9231 | 0.3429 | 0.5     |
| CMlknn | 22 | 35 | 1      | 0.6286 | 0.7720  |
| LPCIT  | 5  | 35 | 1      | 0.1429 | 0.2501  |
| NNSCIT | 33 | 6  | 0.5323 | 0.9429 | 0.6805  |
| Ours   | 31 | 32 | 0.9118 | 0.8857 | 0.8986  |

The data can be obtained from the website <https://www.science.org/doi/10.1126/science.1105809>. In our evaluation, we consider the consensus graph proposed in [5] as the ground truth, which has also been adopted by [9] for verifying CI relations. Figure 5(a) in [5] illustrates the causal relationships among the 11 proteins in the dataset. Following the philosophy outlined in Section C.1, we select 50 CI relations and 40 non-CI relations from this graph. The number of samples is 1755 and  $d_z$  varies from 1 to 9.

Table 2 presents the results for all tests. Our method outperforms other approaches by correctly identifying 47 CI relations and achieving the highest recall and F-score.

Table 2: The TP, TN, precision (pre), recall (rec) and F-score of our test and six SOTA methods for the real Flow-Cytometry dataset.

| Method | TP | TN | Pre    | Rec  | F-score |
|--------|----|----|--------|------|---------|
| KCIT   | 32 | 30 | 0.7619 | 0.64 | 0.6957  |
| CCIT   | 33 | 29 | 0.75   | 0.66 | 0.7021  |
| CMlknn | 41 | 26 | 0.7455 | 0.82 | 0.7810  |
| GCIT   | 40 | 24 | 0.7143 | 0.8  | 0.7547  |
| LPCIT  | 38 | 25 | 0.7170 | 0.76 | 0.7379  |
| NNSCIT | 33 | 26 | 0.7021 | 0.66 | 0.6804  |
| Ours   | 47 | 23 | 0.7344 | 0.94 | 0.8246  |

## References

- [1] Catherine L Blake and Christopher J Merz. Uci repository of machine learning databases, 1998.
- [2] Daphne Koller and Nir Friedman. *Probabilistic graphical models: principles and techniques*. MIT Press, 2009.
- [3] Honghao Li, Vincent Cabeli, Nadir Sella, and Hervé Isambert. Constraint-based causal structure learning with consistent separating sets. In *Advances in Neural Information Processing Systems*, 32, 2019.
- [4] Dimitris Margaritis. Distribution-free learning of bayesian network structure in continuous domains. In *Proceedings of the 20th National Conference on Artificial Intelligence*, volume 5, pages 825–830, 2005.
- [5] Joris M Mooij and Tom Heskes. Cyclic causal discovery from continuous equilibrium data. In *Proceedings of the 29th Conference on Uncertainty in Artificial Intelligence*, pages 431–439, 2013.
- [6] Sudipto Mukherjee, Himanshu Asnani, and Sreeram Kannan. Ccmi: Classifier based conditional mutual information estimation. In *Proceedings of the 36th Conference on Uncertainty in Artificial Intelligence*, pages 1083–1093, 2020.
- [7] Ignavier Ng, AmirEmad Ghassami, and Kun Zhang. On the role of sparsity and dag constraints for learning linear dags. In *Advances in Neural Information Processing Systems*, 33, 2020.

- 515 [8] Karen Sachs, Omar Perez, Dana Pe'er, Douglas A Lauffenburger, and Garry P Nolan.  
516 Causal protein-signaling networks derived from multiparameter single-cell data. *Science*,  
517 308(5721):523–529, 2005.
- 518 [9] Rajat Sen, Ananda Theertha Suresh, Karthikeyan Shanmugam, Alexandros G Dimakis, and  
519 Sanjay Shakkottai. Model-powered conditional independence test. *In Advances in Neural*  
520 *Information Processing Systems*, 30, 2017.
- 521 [10] Shengyu Zhu, Ignavier Ng, and Zhitang Chen. Causal discovery with reinforcement learning.  
522 *In International Conference on Learning Representations*, 2020.
